# Supplementary material for: New CO tolerant electro-catalysts exceeding Pt–Ru for the anode of fuel cells
Source: Royal Society of Chemistry journal article supplement (doi:10.1039/b415271a), 2005-01-01
Supplement: b415271a.pdf [file b415271a.pdf]

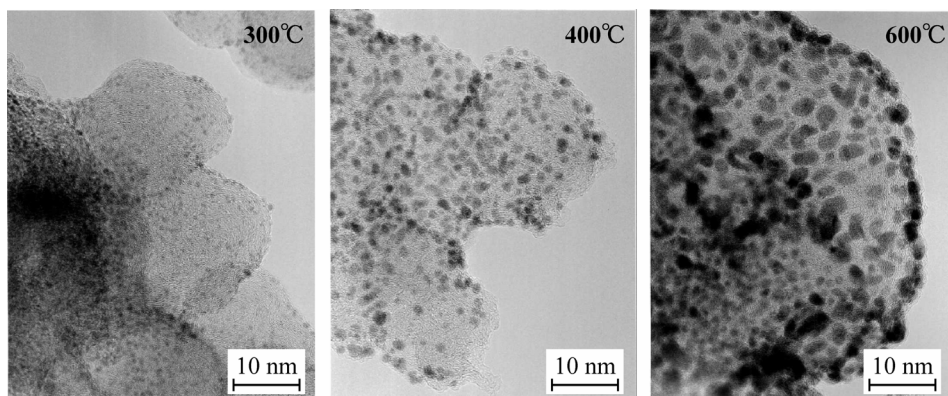

The TEM image of Pt-VO(salen)/C heat-treated at 300°C, 400°C and 600°C are shown in the Figure. The size of the particles increased with increasing the heat-treatment temperature. The highest catalytic activity was observed at 400°C treatment, and at this temperature the particle size was about 1 to 3 nm.

After the heat-treatment, 30 mg of the catalyst-supported carbon powder (abbreviated as Pt-VO(salen)/C, etc.) was mixed with 500 mg of 5 % Nafion solution (Aldrich) together with 0.1 cm<sup>3</sup> of ethanol, to get an ink of the mixture. This mixture was then transferred to the carbon paper disk (TORAY TPG-H-090, 8 mm diameter). The amount of Pt in the mixed catalyst was  $5.4 \times 10^{-4}$  g(Pt) cm<sup>-2</sup>, for the apparent electrode area of the disk. Half side membrane electrode assembly (half-MEA) was prepared by hot-pressing the catalyst loaded carbon paper disk to Nafion 115 membrane at the pressure of 100 kg cm<sup>-2</sup> at 130 °C for 3 minute.
